# Supplementary material for: Assessment of the Effectiveness of a Seasonal-Long Insecticide-Based Control Strategy against Aedes albopictus Nuisance in an Urban Area
Source: PubMed Central journal article supplement (PMC4777573; doi:10.1371/journal.pntd.0004463), 2016-03-03
Supplement: pntd.0004463.s001.pdf [file pntd.0004463.s001.pdf]

**Supplementary Tables**

**Table S1. Effectiveness (%) of single insecticide sprayings on caged mosquitoes based on Henderson’s formula.**

| Treatment | Row   | Distance from insecticide spraying |        |       |       | Total |
|-----------|-------|------------------------------------|--------|-------|-------|-------|
|           |       | 10 m                               | 30 m   | 50 m  | 70 m  |       |
| T2        | 1     | 37.93                              | 1.72   | 12.07 | -3.45 | 12.07 |
|           | 2     | 1.72                               | 12.07  | 1.72  | -3.45 | 3.02  |
|           | 3     | 100.00                             | 1.72   | 1.72  | 6.90  | 27.59 |
|           | Total | 46.55                              | 5.17   | 5.17  | 0.00  | 14.22 |
| T3        | 1     | 94.74                              | 15.79  | 10.53 | -     | 40.35 |
|           | 2     | 100.00                             | 31.58  | 21.05 | -     | 50.88 |
|           | 3     | 100.00                             | 73.68  | 57.89 | -     | 77.19 |
|           | Total | 98.25                              | 40.35  | 29.82 | -     | 56.14 |
| T4        | 1     | 100.00                             | 57.45  | 62.77 | -     | 73.40 |
|           | 2     | 100.00                             | 68.09  | 46.81 | -     | 71.63 |
|           | 3     | 100.00                             | 57.45  | 41.49 | -     | 66.31 |
|           | Total | 100.00                             | 60.99  | 50.35 | -     | 70.45 |
| T5        | 1     | 1.77                               | -0.88  | 9.73  | 7.08  | 4.42  |
|           | 2     | 94.69                              | 52.21  | 28.32 | 1.77  | 44.25 |
|           | 3     | 86.73                              | 81.42  | 49.56 | 1.77  | 54.87 |
|           | Total | 61.06                              | 44.25  | 29.20 | 3.54  | 34.51 |
| T6        | 1     | 94.83                              | 100.00 | 94.83 | 1.72  | 72.84 |
|           | 2     | 100.00                             | 12.07  | -3.45 | 1.72  | 27.59 |
|           | 3     | 6.90                               | 12.07  | 6.90  | 1.72  | 6.90  |
|           | Total | 67.24                              | 41.38  | 32.76 | 1.72  | 35.78 |
| T7        | 1     | -1.79                              | 8.93   | 8.93  | 3.57  | 4.91  |
|           | 2     | 100.00                             | -1.79  | -7.14 | -1.79 | 22.32 |
|           | 3     | 100.00                             | 35.71  | -7.14 | -1.79 | 31.70 |
|           | Total | 66.07                              | 14.29  | -1.79 | 0.00  | 19.64 |
| T8        | 1     | 100.00                             | 64.10  | 7.69  | -2.56 | 42.31 |
|           | 2     | 100.00                             | 23.08  | 12.82 | -2.56 | 33.33 |
|           | 3     | 100.00                             | 58.97  | -2.56 | 2.56  | 39.74 |
|           | Total | 100.00                             | 48.72  | 5.98  | -0.85 | 38.46 |

Positive values indicate a reduction in treated site after adjusting with control site reduction. Row=Road along which cages were located at various distance from insecticide spraying (see Figure 1).
