# Supplementary material for: Assessment of the Effectiveness of a Seasonal-Long Insecticide-Based Control Strategy against Aedes albopictus Nuisance in an Urban Area
Source: PubMed Central journal article supplement (PMC4777573; doi:10.1371/journal.pntd.0004463), 2016-03-03
Supplement: pntd.0004463.s002.pdf [file pntd.0004463.s002.pdf]

**Table S2. Concentration of Permethrin detected in each cage after single insecticide sprayings.**

| Treatment | Row   | Distance from insecticide spraying |             |             |             | Total       |
|-----------|-------|------------------------------------|-------------|-------------|-------------|-------------|
|           |       | 10 m                               | 30 m        | 50 m        | 70 m        |             |
| T2        | 1     | 0.001682827                        | nd          | nd          | nd          | 0.001682827 |
|           | 2     | nd                                 | nd          | 0.001359008 | nd          | 0.001359008 |
|           | 3     | 0.06454743                         | 0.000794418 | nd          | nd          | 0.065341848 |
|           | Total | 0.066230257                        | 0.000794418 | 0.001359008 | nd          | 0.068383683 |
| T3        | 1     | 0.003272307                        | 0.001362227 | nd          | na          | 0.004634534 |
|           | 2     | 0.085726332                        | nd          | nd          | na          | 0.085726332 |
|           | 3     | 0.021510445                        | 0.001600424 | 0.002191409 | na          | 0.025302278 |
|           | Total | 0.110509084                        | 0.002962651 | 0.002191409 | na          | 0.115663144 |
| T4        | 1     | 0.002228104                        | 0.001169095 | 0.001218022 | na          | 0.004615221 |
|           | 2     | 0.022383404                        | 0.126931778 | 0.001490339 | na          | 0.150805521 |
|           | 3     | 0.036653958                        | 0.003057286 | 0.003838829 | na          | 0.043550073 |
|           | Total | 0.061265466                        | 0.131158159 | 0.00654719  | na          | 0.198970815 |
| T5        | 1     | nd                                 | 0.000733259 | nd          | nd          | 0.000733259 |
|           | 2     | 0.010346104                        | nd          | nd          | nd          | 0.010346104 |
|           | 3     | 0.003798915                        | 0.001121456 | nd          | nd          | 0.004920371 |
|           | Total | 0.014145019                        | 0.001854715 | nd          | nd          | 0.015999734 |
| T6        | 1     | 0.017361961                        | 0.002483039 | nd          | 0.000653431 | 0.020498431 |
|           | 2     | 0.003509216                        | nd          | nd          | nd          | 0.003509216 |
|           | 3     | nd                                 | nd          | nd          | nd          | nd          |
|           | Total | 0.020871177                        | 0.002483039 | nd          | 0.000653431 | 0.024007647 |
| T7        | 1     | nd                                 | nd          | nd          | nd          | nd          |
|           | 2     | 0.031839811                        | nd          | nd          | nd          | 0.031839811 |
|           | 3     | 0.006144186                        | 0.002258362 | nd          | nd          | 0.008402548 |
|           | Total | 0.037983997                        | 0.002258362 | nd          | nd          | 0.040242359 |
| T8        | 1     | 0.008507483                        | 0.000885834 | nd          | nd          | 0.009393317 |
|           | 2     | 0.003855567                        | nd          | nd          | nd          | 0.003855567 |
|           | 3     | nd                                 | nd          | nd          | nd          | nd          |
|           | Total | 0.01236305                         | 0.000885834 | nd          | nd          | 0.013248884 |

nd = Permethrin concentration under detection threshold (< 0.0006 µg/cm<sup>2</sup>); na = no exposed cages available.  
 Row=Road along which cages were located at various distance from insecticide spraying (see Figure 1).
