# Supplementary material for: Assessment of the Effectiveness of a Seasonal-Long Insecticide-Based Control Strategy against Aedes albopictus Nuisance in an Urban Area
Source: PubMed Central journal article supplement (PMC4777573; doi:10.1371/journal.pntd.0004463), 2016-03-03
Supplement: pntd.0004463.s003.pdf [file pntd.0004463.s003.pdf]

**Table S3. Effectiveness (%) of single insecticide sprayings on wild mosquitoes based on Henderson’s formula.**

| Treatment | Treated site |                                |                                 | Control site |                                |                                 | Effectiveness (%) |
|-----------|--------------|--------------------------------|---------------------------------|--------------|--------------------------------|---------------------------------|-------------------|
|           | ST           | Pre-treatment Mean ( $\pm$ SE) | Post-treatment Mean ( $\pm$ SE) | ST           | Pre-treatment Mean ( $\pm$ SE) | Post-treatment Mean ( $\pm$ SE) |                   |
| <b>T1</b> | 24/23        | 0.50 $\pm$ 0.16                | 0.00 $\pm$ 0.00                 | 19/19        | 1.63 $\pm$ 0.37                | 0.16 $\pm$ 0.12                 | 100%              |
| <b>T2</b> | 24/24        | 0.17 $\pm$ 0.10                | 0.08 $\pm$ 0.06                 | 19/19        | 0.53 $\pm$ 0.14                | 0.11 $\pm$ 0.07                 | 0%                |
| <b>T3</b> | 24/24        | 0.58 $\pm$ 0.16                | 0.46 $\pm$ 0.17                 | 19/19        | 1.47 $\pm$ 0.32                | 0.68 $\pm$ 0.22                 | 0%                |
| <b>T4</b> | 23/24        | 0.43 $\pm$ 0.20                | 0.17 $\pm$ 0.08                 | 19/19        | 2.26 $\pm$ 0.57                | 1.95 $\pm$ 0.33                 | 55.5%             |
| <b>T5</b> | 22/24        | 0.41 $\pm$ 0.18                | 0.21 $\pm$ 0.10                 | 19/19        | 0.84 $\pm$ 0.19                | 1.00 $\pm$ 0.30                 | 57.1%             |
| <b>T6</b> | 24/24        | 0.04 $\pm$ 0.04                | 0.38 $\pm$ 0.13                 | 19/19        | 0.26 $\pm$ 0.17                | 1.00 $\pm$ 0.29                 | 0%                |
| <b>T7</b> | 21/22        | 0.52 $\pm$ 0.15                | 0.14 $\pm$ 0.07                 | 18/19        | 0.72 $\pm$ 0.23                | 1.16 $\pm$ 0.32                 | 83.8%             |
| <b>T8</b> | 19/24        | 0.47 $\pm$ 0.14                | 0.12 $\pm$ 0.07                 | 19/19        | 1.16 $\pm$ 0.34                | 0.11 $\pm$ 0.07                 | 0%                |

Positive Effectiveness values indicate a reduction in treated site after adjusting with control site reduction. Zero percentage values indicate a minor reduction in treated site compared to control site or no reduction post treatment at all. ST = Number of active STs pre/post insecticide treatment.
