# Supplementary material for: Assessment of the Effectiveness of a Seasonal-Long Insecticide-Based Control Strategy against Aedes albopictus Nuisance in an Urban Area
Source: PubMed Central journal article supplement (PMC4777573; doi:10.1371/journal.pntd.0004463), 2016-03-03
Supplement: pntd.0004463.s005.pdf [file pntd.0004463.s005.pdf]

**Table S5. Linear Mixed Model of water leftover in sticky traps located in treated and untreated site as a function of rainfall.**

| <b>LMM-2</b>        | <b>Coeff.</b> | <b>Std. Error</b> | <b>t-value</b> | <b>Pr(&gt; t )</b> |
|---------------------|---------------|-------------------|----------------|--------------------|
| Intercept           | 4.725         | 0.070             | 67.227         | <0.0001            |
| Treated             | -0.348        | 0.058             | -5.998         | <0.0001            |
| Mm of rain          | 0.011         | 0.004             | 2.994          | 0.0049             |
| Mm of rain *Treated | 0.006         | 0.001             | 4.744          | <0.0001            |

The reference level is untreated site. Number of observation = 1523, number of collections = 36, number of trap = 43.  
 Estimated random effect standard deviation: collection = 0.29, trap = 0.18.
