# Supplementary material for: Assessment of the Effectiveness of a Seasonal-Long Insecticide-Based Control Strategy against Aedes albopictus Nuisance in an Urban Area
Source: PubMed Central journal article supplement (PMC4777573; doi:10.1371/journal.pntd.0004463), 2016-03-03
Supplement: pntd.0004463.s007.pdf [file pntd.0004463.s007.pdf]

**Figure S2. Result of Linear Mixed Model for relationship between water leftover in sticky trap and temperature (A) or rainfall (B) in treated and untreated site.**

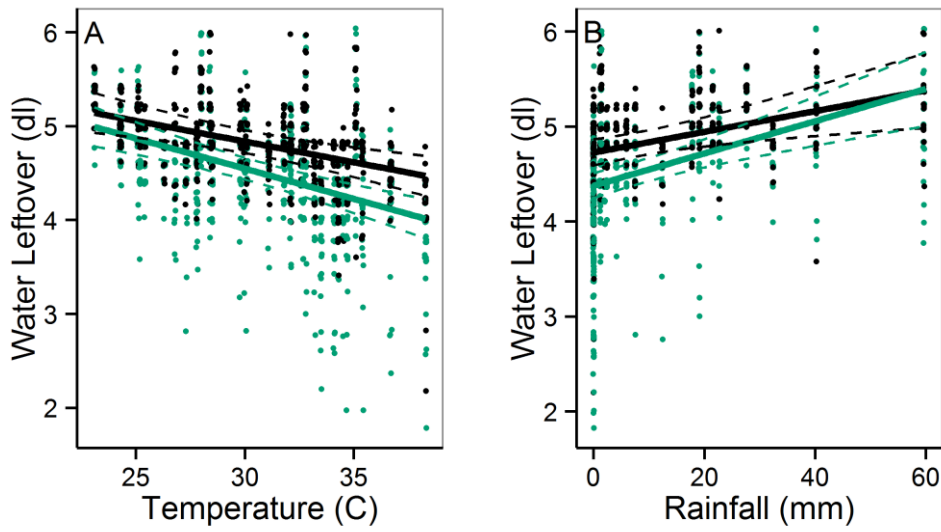

Initial values of water leftover= 5 dl; values >5 dl are due to rainfall or artificial watering. Lines=predicted mean value of water leftover; dashed line=95% confidence intervals. Green =treated site; black =untreated site.
