# Supplementary material for: Assessment of the Effectiveness of a Seasonal-Long Insecticide-Based Control Strategy against Aedes albopictus Nuisance in an Urban Area
Source: PLOS journal article supplement (doi:10.1371/journal.pntd.0004463), 2016-03-03
Supplement: S4 (10.1371/journal.pntd.0004463.s004) [file journal.pntd.0004463.s004]

**Table S4. Linear Mixed Model of water leftover in sticky traps located in treated and untreated site as a function of temperature.**

| <b>LMM-1</b>        | <b>Coeff.</b> | <b>Std. Error</b> | <b>t-value</b> | <b>Pr(&gt; t )</b> |
|---------------------|---------------|-------------------|----------------|--------------------|
| Intercept           | 5.141         | 0.101             | 47.685         | <0.0001            |
| Treated             | -0.149        | 0.066             | -2.252         | 0.027              |
| Temperature         | -0.044        | 0.012             | -3.768         | 0.0005             |
| Temperature*Treated | -0.020        | 0.005             | -4.616         | <0.0001            |

The reference level is untreated site. Number of observation = 1523, number of collections = 36, number of trap = 43.  
 Estimated random effect standard deviation: collection = 0.27, trap = 0.18
